# Supplementary material
Source: HighWire-hosted journal article supplement (https://bmjopen.bmj.com/content/9/8/e025500)
Supplement: inline-supplementary-material-2 [file inline-supplementary-material-2.pdf]

**Supplementary file 2 <EUS form>**

Name: ..... GOULASH + number: .....

TAJ: ..... Date of EUS: .....

Type of echoendoscope: ☐ radial ☐ linear

Serial type of echoendoscope: .....

Used frequency: .....MHz

Sedation: ☐ no sedation ☐ midazolam: .....mg ☐ fentanyl: .....mg

Duration of EUS:.....min

Pancreas Size: ☐ Normal☐ Partially enlarged (body AP diameter is over 2 cm and/or head AP diameter is over 2,5 cm, none exceeds 3 cm)☐ Definitely enlarged (any part over 3 cm AP diameter)Peripancreatic fluid: ☐ None☐ Present☐ Large pseudocyst(s)

Size of peripancreatic fluid or pseudocyst: ..... mm

**Parenchymal features (Rosemont criteria<sup>1</sup>)**Hyperechoic foci with shadowing (echogenic structures  $\geq 2$  mm in length and width that shadow):☐ YES (Major A) ☐ NOLobularity with honeycombing (Well-circumscribed,  $\geq 5$  mm structures with enhancing rim and relatively echo-poor center):☐ YES (Major B) ☐ NO

Lobularity without honeycombing (Noncontiguous lobules):

☐ YES (Minor) ☐ NOHyperechoic foci without shadowing (echogenic structures  $\geq 2$  mm in length and width without shadowing):☐ YES (Minor) ☐ NO

Cysts (Anechoic, rounded/elliptic structures with or without septations):

☐ YES (Minor) ☐ NO

**Stranding** (Hyperechoic lines  $\geq 3$  mm in length seen in at least 2 different directions with respect to the imaged plane):

☐ YES (Minor) ☐ NO

**Ductal features (Rosemont criteria<sup>1</sup>)** (Except for ductal calculi all other features should be looked in the body and tail of pancreas only)

**Main pancreatic duct (MPD) calculi** (Echogenic structures within MPD with acoustic shadowing):

☐ YES (Major A) ☐ NO

**Irregular MPD contour** (uneven or irregular in outline and ectatic course):

☐ YES (Minor) ☐ NO

**Dilated side branches** (presence of  $\geq 3$  tubular anechoic structures each measuring  $\geq 1$  mm in width budding from the MPD):

☐ YES (Minor) ☐ NO

**Main pancreatic duct dilatation** (MPD diameter  $\geq 3.5$  mm in the pancreatic body or  $\geq 1.5$  mm in the pancreatic tail):

☐ YES (Minor) ☐ NO

**Hyperechoic MPD margin** (Echogenic, distinct structure greater than  $>50\%$  of the entire MPD of the body and tail):

☐ YES (Minor) ☐ NO

**Endoscopic ultrasound diagnosis of chronic pancreatitis based upon Rosemont criteria**

- ☐ Consistent with CP:
  - ☐ One Major A feature with  $\geq 3$  Minor features
  - ☐ Major A feature and Major B feature
  - ☐ 2 Major A features
- ☐ Suggestive of CP:
  - ☐ One Major A feature with  $< 3$  Minor features
  - ☐ 1 Major B feature with  $\geq 3$  Minor features
  - ☐  $\geq 5$  Minor features
- ☐ Indeterminate for CP:
  - ☐ 3 or 4 Minor features with no major features
  - ☐ Major B feature alone or with  $< 3$  Minor features.
- ☐ Normal:  $< 3$  Minor features, no major features.

**Necrotizing area** (nonenhancement): ☐ YES ☐ NO

Largest diameter of necrosis area: ..... mm

Location of necrosis: ☐ head ☐ body ☐ tail

## EUS-FORM

Type of necrosis: ☐ patchy ☐ full width

Estimated necrosis: ☐ 0% ☐ < 30% ☐ 30-60% ☐ above 60%

**Enlarged lymph nodes:** ☐ YES ☐ NO

Echostructure: ☐ heterogeneous ☐ homogeneous

Echogenicity: ☐ hypoechogenic ☐ hyperechogenic ☐ mixed

Shape: ☐ triangle ☐ round

Size (long and short axis): .....mm Number: .....

Border: ☐ smooth, well defined ☐ ill-defined

Presence of necrosis: ☐ yes ☐ no

Presence of calcification: ☐ yes ☐ no

**Pancreas cancer<sup>2</sup>:** ☐ YES ☐ NO

☐ T1 (the tumor is inside the pancreas and is 2cm or less in any direction)

☐ T1A (the cancer in no more than 0.5 cm in size in any direction)

☐ T1B (more than 0.5 cm but no more than 1cm in size in any direction)

☐ T1C (more than 1 cm but no more than 2cm in size in any direction)

☐ T2 (more than 2 cm but no more than 4cm in size in any direction)

☐ T3 (more than 4 cm in size)

☐ T4 (the cancer has grown outside the pancreas, into the nearby large blood vessels)

☐ N0 (there are no lymph nodes containing cancer)

☐ N1 (there are 1 to 3 lymph nodes that contain cancer cells)

☐ N2 (that there is cancer in more than 4 lymph nodes)

☐ M0 (the cancer has not spread into distant organs such as the liver or lungs)

☐ M1 (the cancer has spread to other organs)

**Elastography<sup>3</sup> performed:** ☐ YES ☐ NO

☐ Type 1 (with homogeneous pattern)

☐ Type 2 (with 2 or 3 colours)

☐ Type 3 (with a honeycomb pattern)

**Contrast enhanced EUS<sup>4</sup> performed:** ☐ YES ☐ NO

☐ vascularisation: ☐ avascular

## EUS-FORM

☐ (parietal) vascularized nodules and septa

☐ vascular: ☐ arterial ☐ arterial and venous

**FNA performed:** ☐ YES ☐ NO

if YES, site: ☐ pancreas head ☐ pancreas body ☐ pancreas tail

☐ pseudocyst ☐ lymph node ☐ liver ☐ other:.....

Number of passes: ..... Needle used: ☐ 19G ☐ 22G ☐ 25G

Suction type: ☐ stylet slow-pull ☐ vacuum: ..... ml ☐ wet suction

**Pseudocyst drainage:** ☐ YES ☐ NO

**Stentimplantation?** ☐ YES ☐ NO

Type of stent? ☐ plastic ☐ metal

☐ fully covered ☐ partially covered ☐ lumen apposing stent ☐ double-pigtail stent

**Extrapancreatic findings:**

☐ Inflammation (Cholecystitis, Duodenitis, etc.) ☐ YES ☐ NO

location.....

☐ Cholecystolithiasis: ☐ YES ☐ NO

☐ Choledocholithiasis: ☐ YES ☐ NO

☐ Venous thrombosis: ☐ YES ☐ NO

if yes: ☐ v.portae ☐ v.hepatica ☐ v.lienalis ☐ other:.....

☐ Other: .....

**Distant abdominal fluid:** ☐ YES ☐ NO

☐ Small amount (hard to see, less than 2 cm in lesser pelvis, less than 1 cm around liver/spleen)

☐ Moderate amount (easy to see, but without pelvic or abdominal distension)

☐ Large amount with abdominal/pelvic distension

**Other Description:**

.....  
.....

<sup>1</sup>Rana SS, Vilmann P. Endoscopic ultrasound features of chronic pancreatitis: A pictorial review. Endosc Ultrasound.2015;4(1):10-4.

<sup>2</sup><https://www.cancerresearchuk.org/about-cancer/pancreatic-cancer/stages-types-grades/tnm-staging>

<sup>3</sup>Janssen J, Schlörer E, Greiner: EUS elastography of the pancreas: feasibility and pattern description of the normal pancreas, chronic pancreatitis, and focal pancreatic lesions. LGastrointest Endosc. 2007;65(7):971-8.

<sup>4</sup> Christoph F. Dietrich, M. Sharma, and M. Hocke: Contrast-Enhanced Endoscopic Ultrasound, Endosc Ultrasound. 2012;1(3):130–136.
